# Supplementary material for: Los modelos iconográficos del Quijote: siglos XVII-XVIII (I). Apuntes teóricos
Source: MDPI journal article supplement (doi:10.3390/pharmaceutics16040516), 2002-01-01
Supplement: s1 [file s1]

## Supporting Information

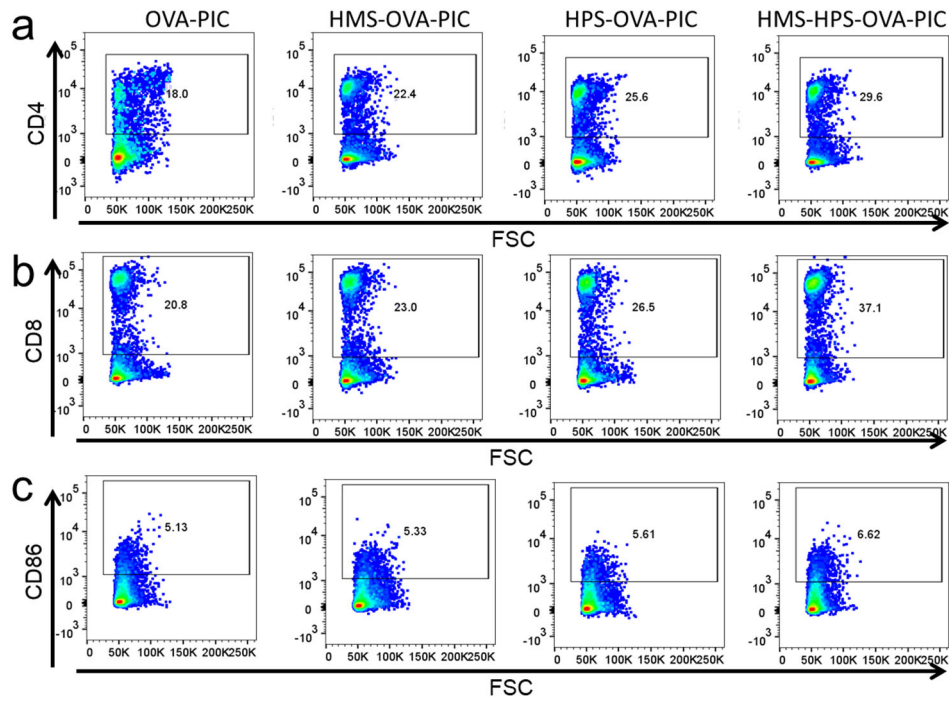

**Figure S1.** Representative results of CD4<sup>+</sup> (a), CD8<sup>+</sup> (b) and CD86<sup>+</sup> (c) in draining lymph node of mice (n=5, p<0.05).
